# Supplementary material for: Treatment to suppression of focal lesions on positron emission tomography-computed tomography is a therapeutic goal in newly diagnosed multiple myeloma
Source: PubMed Central journal article supplement — Haematologica. 2018 Mar 22;103(6):1047–53. doi: 10.3324/haematol.2017.177139 (PMC6058800; doi:10.3324/haematol.2017.177139), 2018-06
Supplement: 2017.177139.DAVIES_SUPPL.pdf [file 2017.177139.DAVIES_SUPPL.pdf]

## Treatment to suppression of focal lesions on positron emission tomography-computed tomography is a therapeutic goal in newly diagnosed multiple myeloma

Faith E. Davies,<sup>1</sup> Adam Rosenthal,<sup>2</sup> Leo Rasche,<sup>1</sup> Nathan M. Petty,<sup>1</sup> James E. McDonald,<sup>3</sup> James A. Ntambi,<sup>3</sup> Doug M. Steward,<sup>1</sup> Susan B. Panozzo,<sup>1</sup> Frits van Rhee,<sup>1</sup> Maurizio Zangari,<sup>1</sup> Carolina D. Schinke,<sup>1</sup> Sharmilan Thanendrarajan,<sup>1</sup> Brian Walker,<sup>1</sup> Niels Weinhold,<sup>1</sup> Bart Barlogie,<sup>1</sup> Antje Hoering,<sup>2</sup> and Gareth J. Morgan<sup>1</sup>

<sup>1</sup>Myeloma Institute, University of Arkansas for Medical Sciences, Little Rock, AR; <sup>2</sup>Cancer Research and Biostatistics, Seattle, WA and <sup>3</sup>Department of Radiology, University of Arkansas for Medical Sciences, Little Rock, AR, USA

©2018 Ferrata Storti Foundation. This is an open-access paper. doi:10.3324/haematol.2017.177139

Received: July 21, 2017.

Accepted: March 8, 2018.

Pre-published: March 22, 2018.

Correspondence: fedavies@uams.edu

---

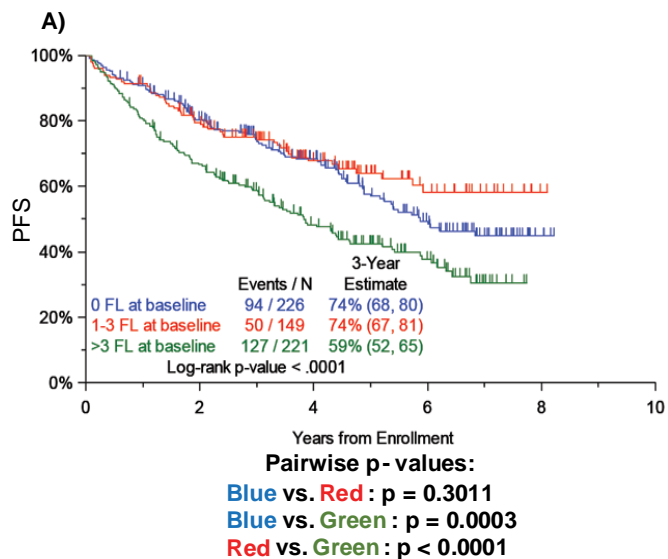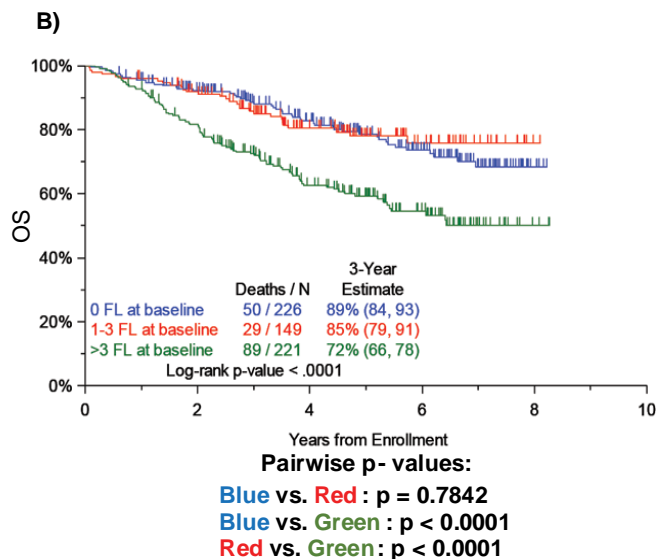

**Figure S1. Survival data according to number of FFLs.** PFS (A) and OS (B) of patients enrolled in TT4 and 6 by 0 FFLs, 1-3 FFLs, and >3 FFLs.

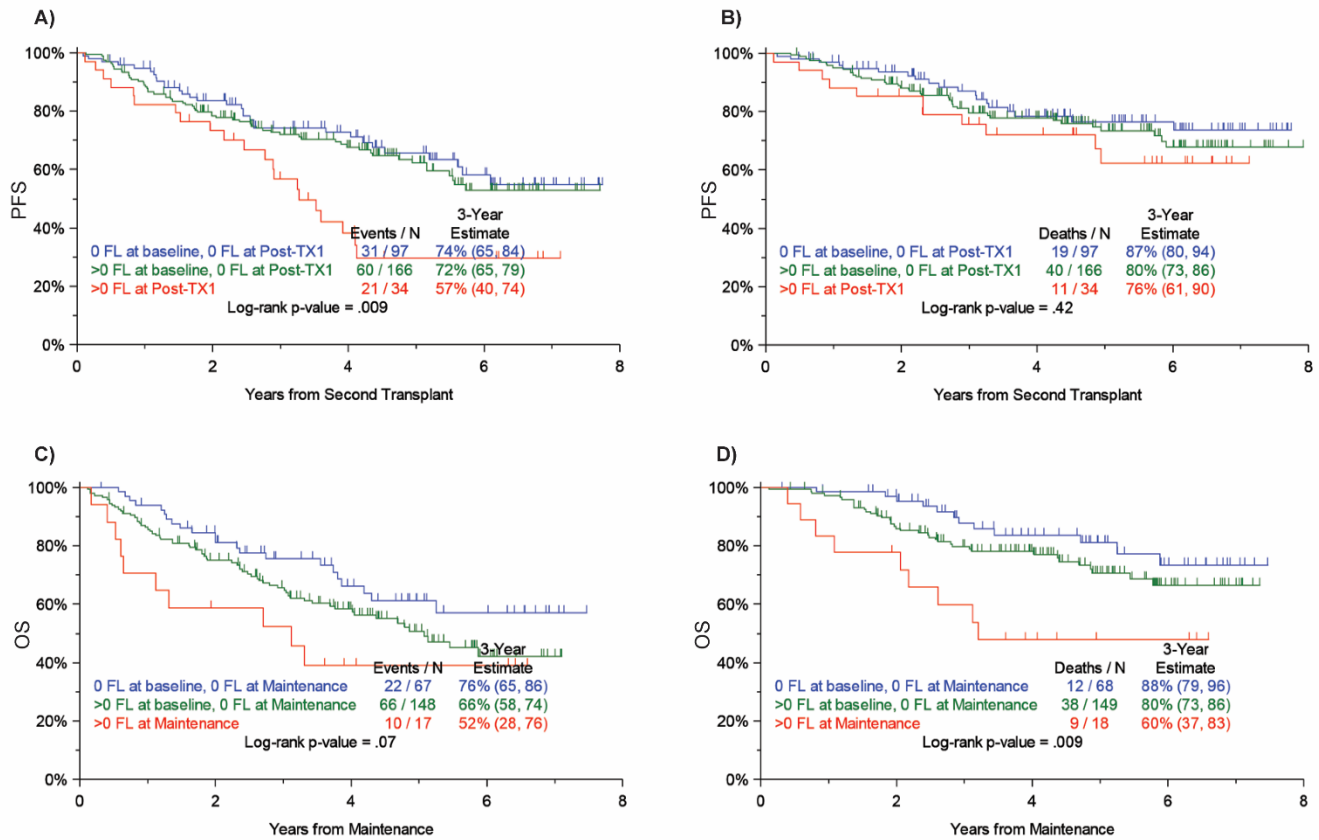

**Figure S2.** PFS (A) and OS (B) from post-first transplant. A significant difference was observed in PFS for patients with no FL at baseline and no FL after first transplant compared to those with lesions present at this timepoint ( $p = 0.0035$ ). A significant difference was also observed in PFS for patients with resolution of FL compared to those with lesions present ( $p = 0.0070$ ). PFS (C) and OS (D) from maintenance. A significant difference was observed in OS for patients with no FL at baseline and no FL at maintenance compared to those with lesions present at this timepoint ( $p = 0.0020$ ). A significant difference was also observed in OS for patients with no resolution of FL compared to those with lesions present ( $p = 0.0187$ ).

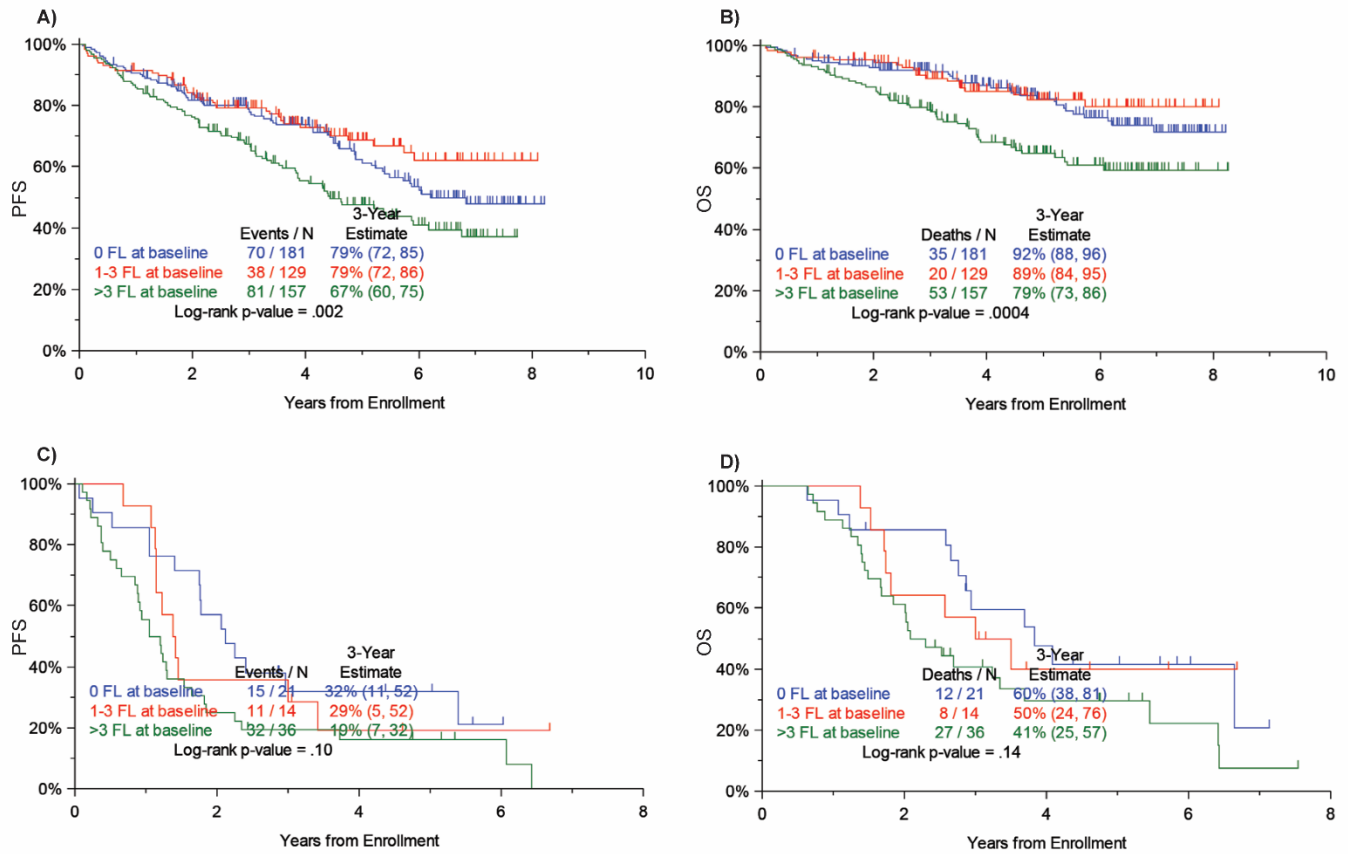

**Figure S3. Survival data according to GEP risk status and FLs.** PFS (A) and OS (B) of GEP70 low risk patients enrolled on TT4 and 6 by 0 FLs, 1-3 FLs, and >3 FLs. PFS (C) and OS (D) of GEP70 high risk patients enrolled on TT5+6 by 0 FLs, 1-3 FLs, and >3 FLs.

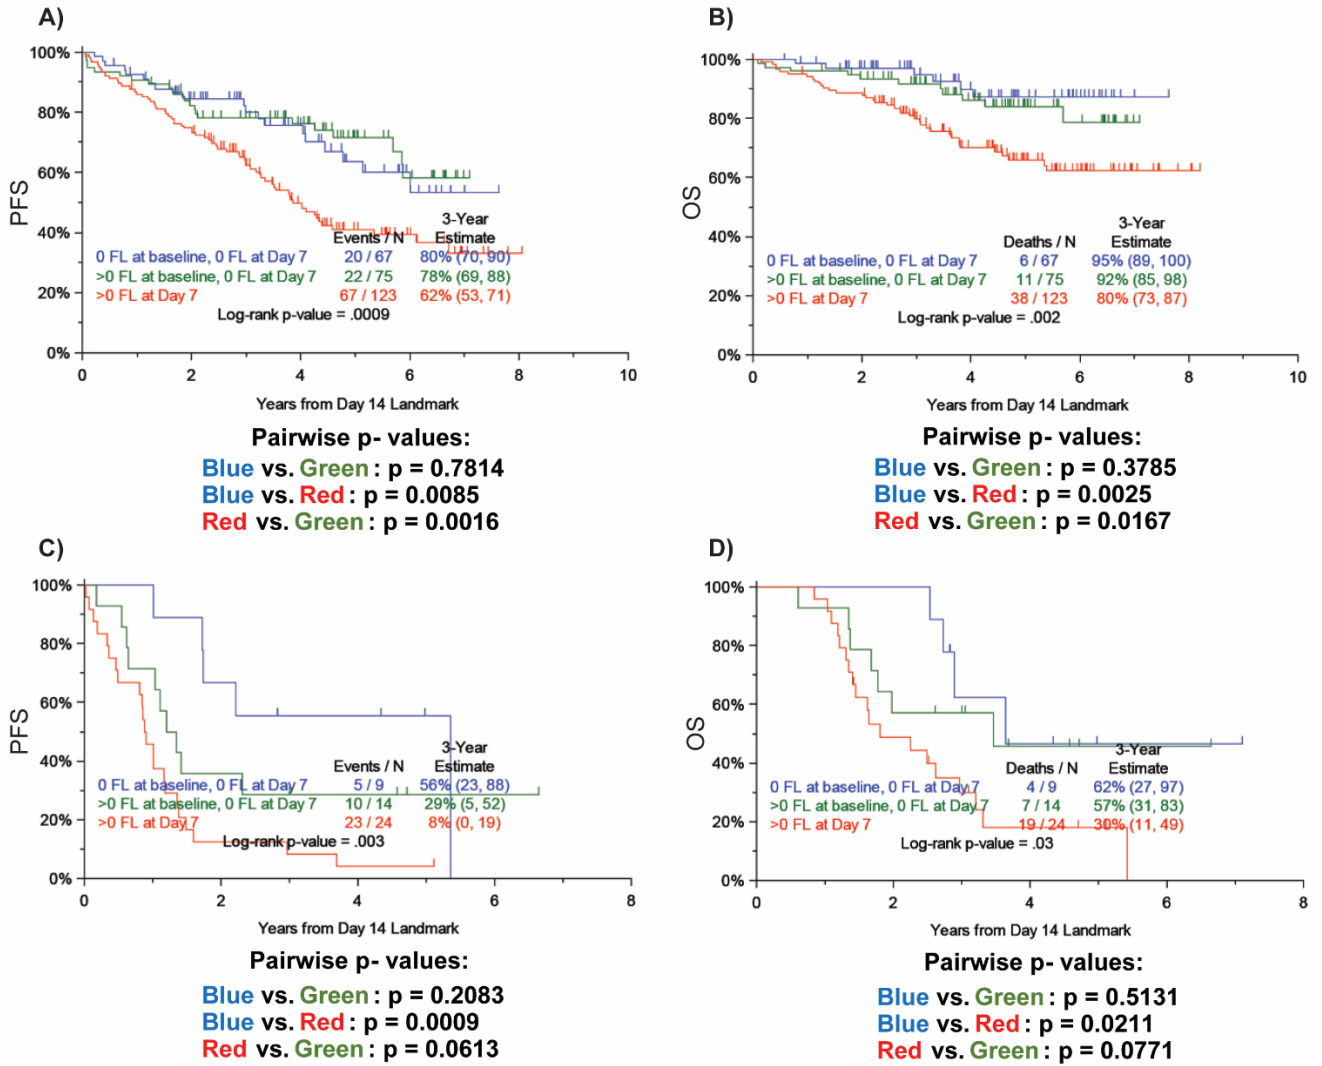

**Figure S4. Survival status according to GEP risk status and FLs at day 7.** PFS (A) and OS (B) for GEP70 low risk patients with 0 FLs, enrolled on TT4 and 6 by baseline and day 7. PFS (C) and OS (D) for High Risk patients with 0 FLs, enrolled on TT5+6 by baseline and Day 7.

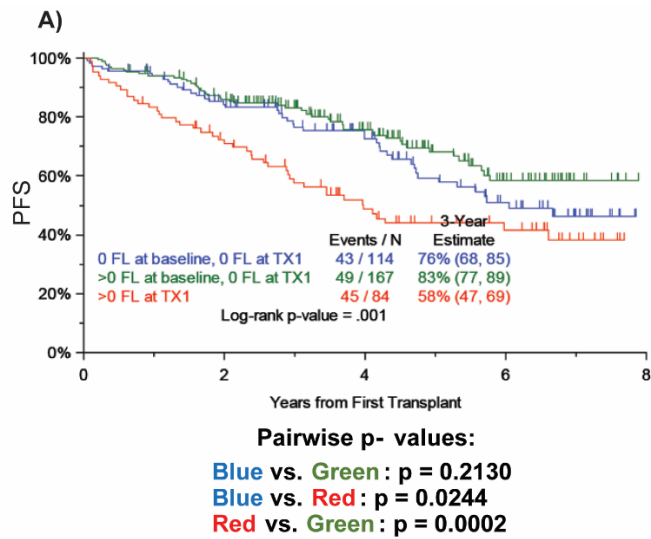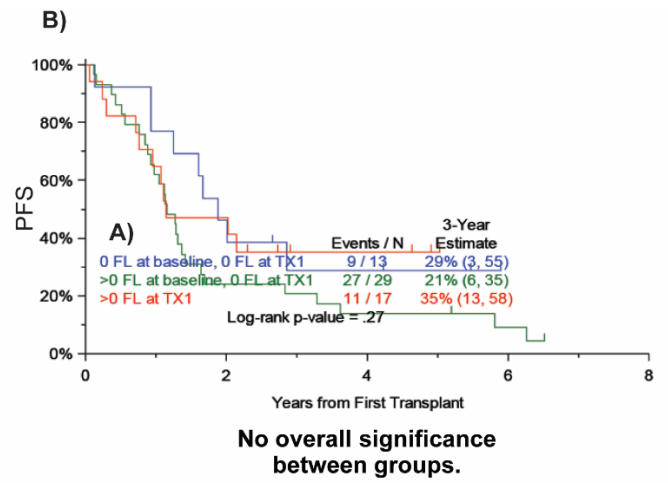

**Figure S5. Survival status according to GEP risk status and FLs at the end of consolidation. PFS for GEP70 low risk (A) and GEP70 high risk (B) for patients with 0 FLs, enrolled on TT4 and 6 by baseline and end of induction.**
