# Supplementary material for: Treatment to suppression of focal lesions on positron emission tomography-computed tomography is a therapeutic goal in newly diagnosed multiple myeloma
Source: PubMed Central journal article supplement — Haematologica. 2018 Mar 22;103(6):1047–53. doi: 10.3324/haematol.2017.177139 (PMC6058800; doi:10.3324/haematol.2017.177139), 2018-06
Supplement: 2017_177139-Disclosures_and_Contributions.pdf [file 2017_177139-Disclosures_and_Contributions.pdf]

Haematologica  
HAEMATOL/2017/177139  
Version 4

Treatment to suppression of focal lesions on positron emission tomography-computed tomography is a therapeutic goal in newly diagnosed multiple myeloma.

Faith E. Davies, Adam Rosenthal, Leo Rasche, Nathan M. Petty, James E. McDonald, James A. Ntambi, Doug M. Steward, Susan B. Panozzo, Frits van Rhee, Maurizio Zangari, Carolina D. Schinke, Sharmilan Thanendrarajan, Brian Walker, Niels Weinhold, Bart Barlogie, Antje Hoering, and Gareth J. Morgan

Disclosures: None

Contributions: FED, GJM: conceived the study, recruited patients to the studies, analyzed the data, and wrote the manuscript AR, AH, LR, BW, NW: analyzed the data NP, DS, SP: managed the trial recruitment / database JEMcD, JAN, performed the image analysis FvR, MZ, CS, ST, BB recruited patients to the studies All authors reviewed and approved the manuscript
