# Supplementary material for: Treatment to suppression of focal lesions on positron emission tomography-computed tomography is a therapeutic goal in newly diagnosed multiple myeloma
Source: PubMed Central journal article supplement — Haematologica. 2018 Mar 22;103(6):1047–53. doi: 10.3324/haematol.2017.177139 (PMC6058800; doi:10.3324/haematol.2017.177139), 2018-06
Supplement: HAEMATOL-2017-177139v4-Davies-01.pdf [file HAEMATOL-2017-177139v4-Davies-01.pdf]

# The serial use of PET- CT can contribute to risk assessment and the prediction of outcome in patients with multiple myeloma

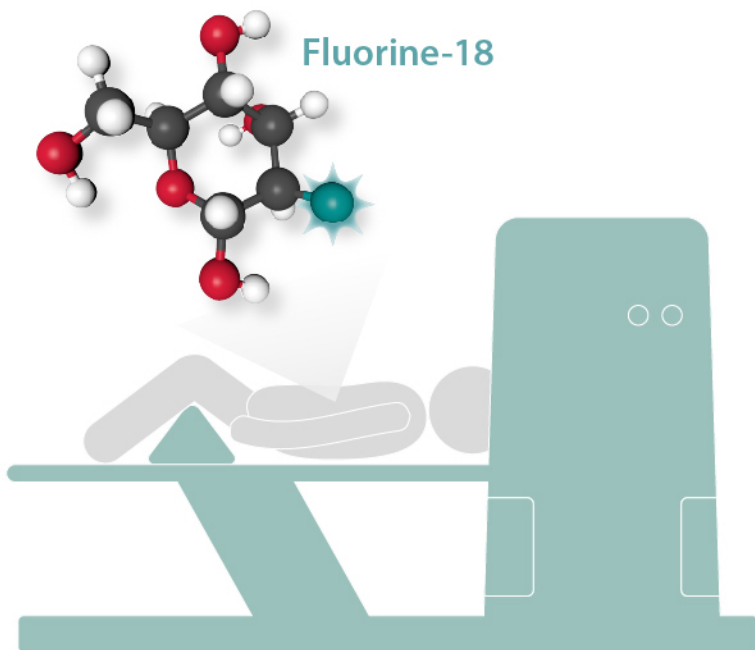

- Fluorine-18 fluorodeoxyglucose positron emission tomography with computed tomography (FDG PET-CT)
-  **596** Patients with multiple myeloma (age  $\geq$  65 years)
-  Detection of **focal lesions (FLs)**: areas measuring  $\geq$  1 cm

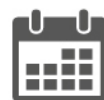

**Time points:**

Presentation  
Day 7  
Post transplant  
End of induction  
Maintenance

|              | FL (n) | 3-yr estimated PFS%<br>(95% CI) | 3-yr estimated OS%<br>(95% CI) |
|--------------|--------|---------------------------------|--------------------------------|
| Presentation | 0      | 74                              | 89                             |
|              | 1-3    | 74                              | 85                             |
|              | >3     | 59                              | 72                             |
| Day 7        | 0      | 76                              | 89                             |
|              | 1-3    | 72                              | 86                             |
|              | >3     | 53                              | 72                             |

- The presence of > 3 FLs detected on PET-CT at baseline and at later time points is associated with adverse progression free survival (PFS) and overall survival (OS)

**Suppression of PET-CT FL activity**

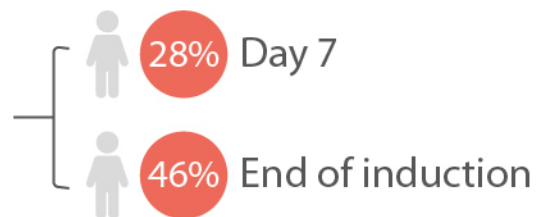

- These patients have a similar outcomes compared to patients who had no FLs at diagnosis
